# Supplementary material for: A review of the functional activities of chia seed and the mechanisms of action related to molecular targets
Source: Royal Society of Chemistry journal article supplement (doi:10.1039/d3fo02197a), 2024-01-01
Supplement: d3fo02197a1.pdf [file d3fo02197a1.pdf]

Supporting materials for

# **A Review of The Functional Activities of Chia Seed and Mechanisms of Action Related to Molecular Targets**

Jinghui Chen<sup>1,2,3</sup>, Gangcheng Wu<sup>1,2,3</sup>, Ling Zhu<sup>1,2,3</sup>, Emad Karrar<sup>1,2,3</sup>, Hui Zhang<sup>\*1,2,3</sup>

<sup>1</sup> State Key Laboratory of Food Science and Technology, Jiangnan University, Wuxi 214122, China.

<sup>2</sup>School of Food Science and Technology, Jiangnan University, Wuxi 214122, China.

<sup>3</sup> National Engineering Research Center for Functional Food, Wuxi 214122, China.

\* Corresponding author: Hui Zhang, Ph.D., Professor.

Tel:0510-85919101; Fax:0510-85919101

E-mail address: [zhanghui@jiangnan.edu.cn](mailto:zhanghui@jiangnan.edu.cn)

Table S1

Composition of chia seed and the health promoting effects

| Composition | Major component                | Extract method                           | Processing                 | Functional properties                                 | Way of action                                                                |
|-------------|--------------------------------|------------------------------------------|----------------------------|-------------------------------------------------------|------------------------------------------------------------------------------|
| CSO         | ALA <sup>1-3</sup>             | cold-pressing <sup>1</sup>               | microwave <sup>3</sup>     | anti-tumor <sup>8</sup>                               | contributes to the expression of nuclear transcription factors <sup>14</sup> |
|             |                                | heat-pressing <sup>1-2</sup>             | roasting <sup>6</sup>      | modulate blood pressure homeostasis <sup>9</sup>      | normalize the operation of calcium and sodium ion channels <sup>9</sup>      |
|             |                                | enzyme assisted solvent <sup>3</sup>     | encapsulation <sup>7</sup> | regulate glucose metabolism <sup>10</sup>             | adjust glycolysis <sup>10</sup>                                              |
|             |                                | microwave assisted solvent <sup>3</sup>  |                            | immunomodulation <sup>11</sup>                        | contribute to proliferation of immunoglobulin E and thymocytes <sup>15</sup> |
|             |                                | ultrasonic assisted solvent <sup>4</sup> |                            | reinforcement of blood lipid regulation <sup>12</sup> | reduce the production of LDL and increase the content of HDL <sup>16</sup>   |
|             |                                | supercritical fluid <sup>5</sup>         |                            | relieve metabolic syndrome <sup>13</sup>              | improve insulin guidance and delivery <sup>17</sup>                          |
|             |                                | Soxhlet extraction <sup>2</sup>          |                            |                                                       |                                                                              |
| CSM         | oligosaccharides <sup>18</sup> | water <sup>19</sup>                      | delivery <sup>22-23</sup>  | moisturize intestines <sup>23</sup>                   | cholesterol-lowering <sup>28</sup>                                           |
|             |                                | ion solution <sup>20</sup>               |                            | regulate blood sugar <sup>24</sup>                    | hypoglycemic <sup>24</sup>                                                   |

|                        |                                                                                                                 |                                                                                                                                                                                                                                       |                             |                                                                                                                                                                                                |                                                                                                                                                                                                                                                                                                                               |
|------------------------|-----------------------------------------------------------------------------------------------------------------|---------------------------------------------------------------------------------------------------------------------------------------------------------------------------------------------------------------------------------------|-----------------------------|------------------------------------------------------------------------------------------------------------------------------------------------------------------------------------------------|-------------------------------------------------------------------------------------------------------------------------------------------------------------------------------------------------------------------------------------------------------------------------------------------------------------------------------|
|                        |                                                                                                                 | ultrasonic assist <sup>21</sup>                                                                                                                                                                                                       |                             | anti-bacteria <sup>25-27</sup>                                                                                                                                                                 | inhibiting cell transduction <sup>29</sup>                                                                                                                                                                                                                                                                                    |
| CPI                    | albumin,<br>globulin,<br>prolamin,<br>glutelin <sup>30-32</sup>                                                 | alkali-solution & acid-<br>isolation <sup>33-34</sup><br>ultra-pure water <sup>35</sup><br>1.0mol/L NaCl <sup>36</sup><br>0.2% NaOH <sup>33</sup>                                                                                     | hydrolysis <sup>37-40</sup> | anti-hypertension <sup>40</sup><br><br>increase satiety <sup>41</sup><br><br>anti-inflammatory <sup>41</sup><br><br>relieve atherosclerosis <sup>41-42</sup>                                   | ACE activity inhibition <sup>40</sup><br><br>blocking elevation of GLP-1 level caused by DPP-IV <sup>41</sup><br><br>5-LOX, COX1, COX2, iNOS inhibition <sup>41</sup><br><br>reduces gene expression in adipogenesis <sup>41-42</sup>                                                                                         |
| Phenol &<br>flavonoids | rosmarinic acid,<br>caffeic acid,<br>salicylic acid,<br>flavonoids,<br>myricetin,<br>quercetin <sup>41-44</sup> | alkaline <sup>45</sup><br><br>methanol-ethanol 70% (v/v) <sup>42</sup><br>mixtures of moderately polar<br>solvents <sup>46-47</sup><br>water: acetone (1: 1) <sup>48</sup><br>water: ethanol: acetone<br>(1:2:3, v/v/v) <sup>46</sup> | concentrate                 | maintain homeostasis in the<br>blood environment <sup>43</sup><br><br>anti-oxidation <sup>41-43</sup><br><br>reduce fat absorption <sup>43</sup><br><br>DNA oxidation protection <sup>43</sup> | curbing the activity of pancreatic lipase and $\alpha$ -glucosidase <sup>43</sup><br><br>free radicals (DPPH, ABTS, OH <sup>-</sup> ) scavenging<br><br>$\beta$ -carotene bleaching inhibition <sup>41-43</sup><br><br>inhibitory of pancreatic lipase activity <sup>43</sup><br><br>free radical scavenging <sup>41-43</sup> |

Abbreviations: CSO, chia seed oil; CSM, chia seed gum, CPI, protein isolation; ALA, alpha linolenic acid; LDL, low density lipoprotein; ACE, angiotensin converting enzyme; GLP-1, glucagon peptide-1; DPP-IV, dipeptidyl peptidase IV; 5-LOX, 5-lipoxygenase; COX1, cyclooxygenase-1; COX2, cyclooxygenase-2; INOS, inducible nitric oxide synthase; DPPH, 2,2-Diphenyl-1-(2,4,6-trinitrophenyl) hydrazyl; ABTS, 2, 2'-azino-bis (3-ethylbenzothiazoline-6-sulfonic acid);

Table S2

## Micronutrients and their contents in CS

| Component     | Name                | Content(mg/100g) | Ref.   | Name            | Content  | Ref.   |
|---------------|---------------------|------------------|--------|-----------------|----------|--------|
| Phenolic acid | polyphenols         | 51.1-97.5        | 49-50  | rosmarinic acid | 92.67    | 50     |
|               | protocatechuic acid | 74.71            | 50     | gallic acid     | 1.15     | 50     |
|               | chlorogenic acid    | 0.468-23.5       | 49-50  | caffeic acid    | 0.3-15.6 | 50-52  |
| Flavonoid     | myricetin           | 0.95             | 49, 52 | quercetin       | 0.6-26.8 | 49, 52 |
|               | kaempferol          | 0.017-50.9       | 50, 52 |                 |          |        |
| Isoflavone    | daidzin             | 0.66             | 52     | genistein       | 0.51     | 49     |
|               | genistin            | 0.34             | 52     | glycerin        | 0.14     | 49     |
|               | glycitein           | 0.05             | 49     |                 |          |        |
| Vitamin       | vitamin A           | 54(IU)           | 52     | thiamine        | 0.62     | 52     |
|               | riboflavin          | 0.17             | 49,52  | nicotinic acid  | 8.83     | 52,53  |
|               | folic acid          | 0.049            | 52     | ascorbic acid   | 1.6      | 52     |
|               | vitamin E           | 0.5-42.7         | 50,52  |                 |          |        |
| Mineral       | sodium              | 16-22.37         | 6,53   | magnesium       | 335-403  | 6,49   |
|               | phosphorus          | 407-870          | 49, 53 | potassium       | 407-870  | 6,49   |

|       |          |               |        |            |           |      |
|-------|----------|---------------|--------|------------|-----------|------|
| ----- | calcium  | 580-829.21    | 49     | manganese  | 5.74      | 53   |
|       | iron     | 7.72-24.4     | 49, 52 | cobalt     | 0.035     | 49   |
|       | copper   | 0.924-1.45    | 52     | zinc       | 4.58-9.11 | 53   |
|       | selenium | 0.055.2-0.078 | 49,52  | molybdenum | 0.2       | 6,52 |

---

Note: IU, international unit

Table S3. Amino acid sequence and the active site of CPI compositions

| Origin                                  | Amino acid sequence     | Access           | Pathway/substance                   | Biological activity                                     | Ref.  |
|-----------------------------------------|-------------------------|------------------|-------------------------------------|---------------------------------------------------------|-------|
| Total protein of chia seed              | YACLKVK                 | <i>in silico</i> | -                                   | antibacterial                                           | 54    |
|                                         | KLKKNL                  |                  |                                     |                                                         |       |
|                                         | LPVFGLAEEGNVTYLH        | digestion        | Mmp-2, PPAR- $\gamma$ , adiponectin | mediate adipocyte differentiation, relieve inflammation | 41    |
|                                         | CNSPGPHDVALDQ           | digestion        | PPAR- $\alpha$                      | prevent adipogenesis, inhibition inflammation           | 55    |
|                                         | RMVLPEYELLYE            |                  | NF- $\kappa$ B                      |                                                         |       |
| Ribulose biphosphate Carboxylase        | VPILIQIRPFPEPKQPWVDVF   | SGID             | DPP-4, $\alpha$ -glucosidase        | antidiabetic activity                                   | 56-57 |
|                                         | VMVNVYPAIPSLPLVEVKVTIH  |                  |                                     |                                                         |       |
|                                         | PGVGVLVVVA              |                  |                                     |                                                         |       |
| Oleosin                                 | SPSLPLPHSHSWVDVFG       |                  |                                     |                                                         |       |
|                                         | VKVSVTVAIAVL            |                  |                                     |                                                         |       |
| Fatty acid (F.A) desaturase 3 isoform 2 | PAVPLIAIHILIRMPNPQPTPW  |                  |                                     |                                                         |       |
|                                         | PYSFHSKVDVVFVHVKVTWVW   |                  |                                     |                                                         |       |
|                                         | YSLPLSWSYVEVGVAVL       |                  |                                     |                                                         |       |
| F.A desaturase 3 isoform 1              | PAVPLIRMPPEPNPQPTWPYSFS |                  |                                     |                                                         |       |
|                                         | HSKVDVKVTWVVIASPLIHIL   |                  |                                     |                                                         |       |
|                                         | SWSYVEGVVLA             |                  |                                     |                                                         |       |
| F.A desaturase 7 isoform 1              | VRINIRPFPGSHVEFVKVMVN   |                  |                                     |                                                         |       |
|                                         | VTWVVIHILPKMPQWFSFSW    |                  |                                     |                                                         |       |
|                                         | SYVGVTVAVLPL            |                  |                                     |                                                         |       |
| F.A desaturase 8                        | PAILPFPEPNSHSYVEFVKVMV  |                  |                                     |                                                         |       |
|                                         | QVTWVVIASLVRIHINIQMPQ   |                  |                                     |                                                         |       |
|                                         | PWSWVGPKVLSFPL          |                  |                                     |                                                         |       |
| F.A desaturase 2 isoform 2              | PASPIAPPGIHPNPYSHSWDVEV |                  |                                     |                                                         |       |
|                                         | GVNVTWVLSFSYVKVLVQVYVA  |                  |                                     |                                                         |       |

|                              |                                                                   |
|------------------------------|-------------------------------------------------------------------|
|                              | PLPHVFIL                                                          |
| F.A desaturase 2 isoform 1   | PASPIAPPGIHIQPKPQYSHSWVD<br>VEVGVNVQVWVSLPHSFSYVKVYV<br>APLVFVLIL |
| Monoacylglycerol             | VAPAIQIRPKPMPTSFYSYVEVHV                                          |
| Acyltransferase              | KVLVTSLVRPEPLVFG                                                  |
| Eukaryotic translation       | VPLIMIRIWPFPGHPQSHVDVFGV                                          |
| Initiation factor            | HVYIAPLPEIHILIQPNVLVQSLVNSK                                       |
| S-adenosylmethionine         | SLIHIMIRPFPHSKVMVTPAPEIAVRP                                       |
| Decarboxylase                | GVDVVFASFYSYVEVYILVL                                              |
| Tubulin beta chain           | VASLVRPLILINPTPYVHVKNVQVT<br>VYIQIRPGSKVDVFGVEVL                  |
| Peptidyl-prolyl cis-trans    | PHPKPMPTSKVDKVMVQVTI                                              |
| Isomerase                    | AVRVEVFGVAIL                                                      |
| Serine threonineprotein      | VAPAIAVRIHIRPGMPNVDM                                              |
| Phosphatase                  | VQVWVYPLVEVFKVTIL                                                 |
| Elongation factor 1-alpha    | PAVRPPLIHIMPESFSHVDVQVYV<br>PIAPLPTSKVTVAPKVLPGVEVGK              |
| Glyceraldehyde-3-Phosphate   | PAIAVRPLIHILPEFPMSFSYSVLV                                         |
| Dehydrogenase                | SVTINVVHVKNVAVEVGVD                                               |
| Actin                        | PAVPVRIHIRIWPEPGHPKVDVE<br>VHVHVVMVWPLIMIQQSSKVAI<br>ASLVGLIL     |
| Clathrin adaptor complex     | PPVAPAIPLINIQQFPGQSWVDV<br>HILIMIRPTSFSYVFGVKVWVY<br>VEVLNVVRT    |
| $\alpha$ -tubulin 7 protease | VASKVDVVFHVG                                                      |

|               |                                                                  |                  |                                                                  |                   |                                                                                                                       |
|---------------|------------------------------------------------------------------|------------------|------------------------------------------------------------------|-------------------|-----------------------------------------------------------------------------------------------------------------------|
| FtsH protease | IAPGSHVDVEVHVLVMVNILVASKVKVT                                     |                  |                                                                  |                   |                                                                                                                       |
| 7S globulin   | PAIPASPIASLPLIQIRIWPGPHQSYVEVK<br>VMVNVVWRPFPTSFDVDFPEINSKVLILVA |                  |                                                                  |                   |                                                                                                                       |
| 11S globulin  | SLPLPEPFGPKPMPTPYVDVEVGVVMVQV                                    | <i>in silico</i> |                                                                  | molecular docking | ACE, DPP-4 activity inhibition, renin inhibitor, antioxidation, 58                                                    |
|               | YPAILIQIRSWSYVFPHPQVAVLVR                                        |                  |                                                                  |                   |                                                                                                                       |
|               | TAQEPTIRF                                                        | <i>in silico</i> |                                                                  | molecular docking | ACE, DPP-4 activity inhibition, antithrombosis 58                                                                     |
|               | PGLTIGDTIPNL                                                     | size exclusion   | inhibit the activities of collagenase, hyaluronidase, tyrosinase |                   | ACE, DPP-4 activity inhibition 59                                                                                     |
|               | LSPNYHPNRL                                                       | chromatography   |                                                                  | and elastase      | ACE activity inhibition, regulation of glucose absorption                                                             |
|               | LIVSPLAGRL                                                       |                  |                                                                  |                   | ACE, DPP-4 activity inhibition, glucose uptake modulation, activate proteolysis mediated by ubiquitin skin anti-aging |
|               | IVSPLAGRL                                                        |                  |                                                                  |                   | ACE, DPP-4 activity inhibition, glucose uptake modulation, activate proteolysis mediated by ubiquitin                 |
|               | APHWYTN                                                          | size exclusion   | inhibit the activities of collagenase, hyaluronidase, tyrosinase |                   | proteolysis mediated by ubiquitin 59                                                                                  |
|               | DQNPRSF                                                          | chromatography   |                                                                  | and elastase      | skin anti-aging                                                                                                       |
|               | GDAHWAY                                                          | /                |                                                                  | antibacterial     |                                                                                                                       |
|               | GDAHWTY                                                          |                  |                                                                  |                   |                                                                                                                       |
|               | GDAHWVY                                                          |                  |                                                                  |                   |                                                                                                                       |
|               | GFEWITF                                                          |                  |                                                                  |                   |                                                                                                                       |
|               | KKLKRYYV                                                         |                  |                                                                  |                   |                                                                                                                       |
|               | KADVPGLKK                                                        |                  |                                                                  | /                 | antibacterial 59                                                                                                      |
|               | KGDVIAIR                                                         |                  |                                                                  |                   | combined with CCR2 56-60                                                                                              |
|               | LKQGDVIAIR                                                       |                  | simulated gastrointestinal digestion                             |                   | antiphlogistic                                                                                                        |
|               | GNIFRGL                                                          |                  |                                                                  |                   |                                                                                                                       |
|               | FQKGIQVVNHK                                                      |                  |                                                                  |                   |                                                                                                                       |
|               | IGTPGKGIL                                                        |                  |                                                                  |                   |                                                                                                                       |
|               | QKGDVIAIR                                                        |                  |                                                                  |                   |                                                                                                                       |
|               | KQGDVIAIR                                                        |                  |                                                                  |                   |                                                                                                                       |



|       |               |                            |                     |                      |       |
|-------|---------------|----------------------------|---------------------|----------------------|-------|
| ----- | QKGDVIAIRA    |                            |                     |                      |       |
|       | KQGDVIAIR     |                            |                     |                      |       |
|       | DVPGLKK       |                            |                     |                      |       |
|       | FAFFEFELFAFFT | simulated gastrointestinal | combined with ICAM1 | relieve inflammation | 56-57 |
|       | LPGPPATF      | digestion                  |                     |                      |       |

---

Abbreviations: Mmp-2, Matrix metalloproteinases-2; SGID, simulated gastrointestinal digestion; PPAR- $\gamma$ , peroxisome proliferator activated receptor gamma; PPAR- $\alpha$ , peroxisome proliferator activated receptor alpha; NF- $\kappa$ B, nuclear factor  $\kappa$  B; DPP-IV, dipeptidyl peptidase IV; ACE, angiotensin converting enzyme; CCR2, C-C motif chemokine receptor 2; ICAM, intercellular cell adhesion molecule.

## References

- 1 I. Ishak, N. Hussain, R. Coorey, M. A. Ghani, *Journal of CO<sub>2</sub> Utilization.*, 2021, 45, 101430.
- 2 M. Ozcan, F. Y. Al-Juhaimi, I. A. A. Mohamed, M. A. Osman, M. A. Gassem, *Food Chemistry.*, 2019, 278, 190-196.
- 3 T. Zare, T. W. T. Rupasinghe, B. A. Boughton, U. Roessner, *Food Research International.*, 2019, 126, 108665.
- 4 S. S. Fernandes, D. Tonato, M. A. Mazutti, B. R. de Abreu, D. C. Cabrera, C. D. R. M. D'Oca, M. D. I. M. Salas-Mellado, *Journal of Food Engineering.*, 2019, 262, 200-208.
- 5 G. Scapin, E. R. Abaide, L. F. Nunes, M. A. Mazutti, R. G. Vendruscolo, R. Wagner, C. S. da Rosa, *The Journal of Supercritical Fluids.*, 2017, 127, 90-96.
- 6 K. Ghafoor, F. Aljuhaimi, M. M. Özcan, N. Uslu, S. Hussain, E. E. Babiker, G. Fadimu, *Journal of Food Processing and Preservation.*, 2018, 42, 13710.
- 7 C. N. Copado, B. W. K. Diehl, V. Y. Ixtaina, M. C. Tomás, *Lwt-Food Science and Technology.*, 2017, 86, 408-417.
- 8 J. Parker, A. N. Schellenberger, A. L. Roe, H. Oketch-Rabah, A. I. Calderon, *Planta Med.*, 2018, 84(9-10), 606-612.
- 9 B. Silva, R. L. Toledo, M. Grancieri, D. Eliza, N. R. Medina, R. R. Silva, N. M. B. Costa, H. S. D. Martino, *Food Research International.*, 2019, 116, 592-599.

- 10 M. D. R. Ferreira, M. E. Oliva, V. Aiassa, M. E. D'Alessandro, *Journal of Functional Foods.*, 2020, 66, 103775.
- 11 I. Fernandez, S. M. Vidueiros, R. Ayerza, W. Coates, A. Pallaro, *Proceedings of the Nutrition Society.*, 2008, 67(OCE1): E12.
- 12 L. B. Sierra, J. Roco, G. Alarcon, *Journal of Functional Foods.*, 2015, 14, 641-649.
- 13 A. Creus, A. Benmelej, N. Villafane, Y. B. Lombardo, *Prostaglandins, Leukotrienes and Essential Fatty Acids.*, 2017, 121, 30-39.
- 14 A. K. A. Wiggins, J. K. Mason, L. U. Thompson, *Experimental Cell Research.*, 2015, 333(1), 147-154.
- 15 R. Ullah, M. Nadeem, A. Khalique, M. Imran, S. Mehmood, A. Javid, J. Hussain, *Journal of Food Science and Technology.*, 2016, 53(4), 1750-1758.
- 16 R. Ayerza, W. Coates, *Tropical Science.*, 2007, 47(4), 183-187.
- 17 B. N. Enes, L. P. D. Moreira, B. P. Silva, M. Grancieri, H. G. Lúcio, V. P. Venâncio, S.U. Mertens-Talcott, C. B. O. Rosa, H. S. D. Martino, *Journal of Food Science.*, 2020, 85(2), 226-239.
- 18 D. G. Rosas-Ramirez, M. Fragoso-Serrano, S. Escandón-Rivera, J. P. Vargas-Ramírez, J. P. Reyes-Grajeda, M. Soriano-García, *Phytotherapy research: PTR.*, 2017, 31, 906-914.
- 19 X. Xing, Y. S. Y. Hsieh, K. Yap, M. E. Ang, J. Lahnstein, M. R. Tucker, V. Bulone, *Carbohydrate Polymers.*, 2017, 175, 231-240.

- 20 L. A. Muñoz, J. M. Aguilera, L. Rodriguez-Turienzo, A. Cobos, O. Diaz, *Journal of Food Engineering.*, 2012a, 111(3), 511-518.
- 21 R. Rabail, M. R. Khan, H. M. Mehwish, M. S. R. Rajoka, J. M. Lorenzo, M. Kieliszek, R. M. Aadil, *Front Biosci (Landmark Ed).*, 2021, 26(9), 643-654.
- 22 Y. P. Timilsena, R. Adhikari, C. J. Barrow, B. Adhikari, *Food Hydrocolloids.*, 2017, 66, 71-81.
- 23 A, S. K. Gangurde, R. More, *Indo American Journal of pharmaceutical Sciences.*, 2018, 5(8), 8356-8362.
- 24 A. Tamargo, D. Martin, J. N. D. Hierro, M. V. Moreno-Arribas, L. A. Munoz, *Food Reserch International.*, 2020, 137, 109364.
- 25 A. Tamargo, C. Cueva, L. Laguna, M. V. Moreno-Arribas, L. A. Muñoz, *Journal of Functional Foods.*, 2018, 50, 104-111.
- 26 M. N. Luo, Y. Cao, W. B. Wang, X. Chen, J. Y. Cai, L. Wang, J. Xiao, *Food Hydrocolloids.*, 2019, 87, 783-791.
- 27 S. R. Mousavi, M. Rahmati-Joneidabad, M. Noshad, *Int J Biol Macromol.*, 2021, 190, 618-623.
- 28 V. O. Alfredo, R. R. Gabriel, C. G. Luis, B. A. David, *LWT-Food Science and Technology.*, 2009, 42(1), 168-173.
- 29 L. Hernández-Morales, H. Espinoza-Gómez, L. Z. Flores-López, E. L. Sotelo-Barrera, A. Núñez-Rivera, R. D. Cadena-Nava, K. A. Espinoza, *Applied Surface Science.*, 2019, 489, 952-961.
- 30 M. R. Sandoval-Oliveros, O. Paredes-Lopez, *Journal of Agricultural and Food Chemistry.*, 2013, 61(1), 193-201.

- 31 K. Kotecka-Majchrzak, A. Sumara, E. Fornal, M. Montowska, Trends in Food Science and Technology., 2020, 106, 160-170.
- 32 B. L. Olivos-Lugo, M. A. Valdivia-Lopez, A. Tecante, Food Science and Technology International., 2010, 16(1), 89-96.
- 33 M. S. Coelho, R. A. M. Soares-Freitas, J. A. G. Arêas, E. A. Gandra, M. D. L. M. Salas-Mellado, Plant Foods for Human Nutrition., 2018, 73,103-107.
- 34 D. N. Lopez, M. Galante, G. Raimundo, D. Spelzini, V. Boeris, Food Res Int., 2019, 116, 419-429.
- 35 Y. P. Timilsena, R. Adhikari, C. J. Barrow, B. Adhikari, Food Chemistry., 2016, 212, 648-656.
- 36 W. W. NING, Ocean University of China, Shanghai(Master), 2017.
- 37 Y. Chim-Chi, S. Gallegos-Tintoré, C. Jiménez-Martínez, G. Dávila-Ortiz, L. Chel-Guerrero, Journal of Food Measurement, 2018, 12, 323-331.
- 38 J. H. Chen, L. Zhu, Q. M. Wu, Y. L. Chen, G. C. Wu, H. Zhang, Food Bioscience., 2023, 55, 102781.
- 39 M. R. Segura-Campos, F. Peralta Gonzalez, L. Chel Guerrero, D. B. Ancona, International Journal of Food Science., 2013, 158482.
- 40 B. Ozon, J. Cotabarren, T. Valicenti, M. G. Parisi, D. W. Obregon, Food Chemistry., 2022, 380, 132185.
- 41 M. Grancieri, H. S. D. Martino, E. G. D. Mejia, Food Chemistry., 2019, 289, 204-214.

- 42 E. C. Kaya, M. H. Oztop, H. Alpas, *LWT - Food Science and Technology.*, 2021, 141, 110872.
- 43 M. J. Rahman, A. C. de Camargo, F. Shahidi, *Journal of Functional Foods.*, 2017, 35, 622-634.
- 44 R. Ayerza, W. Coates, *Industrial Crops and Products.*, 2011, 34(2), 1366-1371.
- 45 L. A. Muñoz, A. Cobos, O. Diaz, J. M. Aguilera, *Journal of Food Engineering.*, 2012b, 108(1), 216-224.
- 46 M. A. Alcântara, S. D. L. B. Polaria, B. R. L. D. A. Meireles, A. E. A. de Lima, J. C. da Silva Junior, É. D. A. Vieira, N. A. D. Santos, M. M. T. D. M. Cordeiro, *Food Chemistry.*, 2019, 275, 489-496.
- 47 G. Dąbrowski, I. Konopka, S. Czaplicki, M. Tańska, *European Journal of Lipid Science and Technology.*, 2016, 119(5), 1600209.
- 48 M. Mondor, *Food Reviews International.*, 2023, 2160457.
- 49 K. Marcinek, Z. Krejpcio, *Roczniki Państwowego Zakładu Higieny.*, 2017, 68(2), 123-129.
- 50 T. F. Roohi, *Journal of Biomedical and Pharmaceutical Research.*, 2020, 9(4), 42-49.
- 51 M. K. Hrnčić, M. Ivanovski, D. Cor, Z. Knez, *Molecules.*, 2019, 25, 11.
- 52 L. A. Muñoz, A. Cobos, O. Diaz, J. M. Aguilera, *Food reviews international.*, 2013, 29(4), 394-408.
- 53 A. M. Samad, Health promoting properties and therapeutic applications Chia seeds (*Salvia hispanica* L.).

[https://www.researchgate.net/publication/344248854\\_Health\\_promoting\\_properties\\_and\\_therapeutic\\_applications\\_Chia\\_seeds\\_Salvia\\_hispanica](https://www.researchgate.net/publication/344248854_Health_promoting_properties_and_therapeutic_applications_Chia_seeds_Salvia_hispanica), 2020.

54 L. A. Madrazo, M. R. S. Campos, *Comput Biol Chem.*, 2022, 98, 107695.

55 M. Grancieri, H. Martino, E. G. D. Mejia, *Current Developments in Nutrition.*, 2020, 4(S2), 399-399.

56 F. V. Zamudio, S. N. Hidalgo-Figueroa, R. R. O. Andrade, A. J. H. Álvarez, M. R. S. Campos, *Food Chemistry.*, 2022, 394, 133479.

57 M. Grancieri, T. A. Verediano, C. T. Sant'Ana, A. D. Assis, R. L. Toledo, E. G. D. Mejia, H. S. D. Martino, *PharmaNutrition.*, 2022, 21, 10098.

58 B. S. Pablo-Osorio, L. Mojica, J. E. Urías-Silvas, *Journal of Food Science.*, 2019, 84(5), 1750-3841.

59 J. E. Aguilar-Toalá, A. M. Liceaga, *Amino Acids.*, 2020, 52, 1149-1159.

60 J. E. Aguilar-Toalá, A. J. Deering, A. M. Liceaga, *Probiotics and Antimicrobial Proteins.*, 2020b, 12, 1571-1581.
